# Supplementary material for: The prognostic potential and oncogenic effects of PRR11 expression in hilar cholangiocarcinoma
Source: PubMed Central journal article supplement (PMC4653015; doi:10.18632/oncotarget.3983), 2015-05-04
Supplement: oncotarget-06-20419-s001.pdf [file oncotarget-06-20419-s001.pdf]

# The prognostic potential and oncogenic effects of PRR11 expression in hilar cholangiocarcinoma

## Supplementary Material

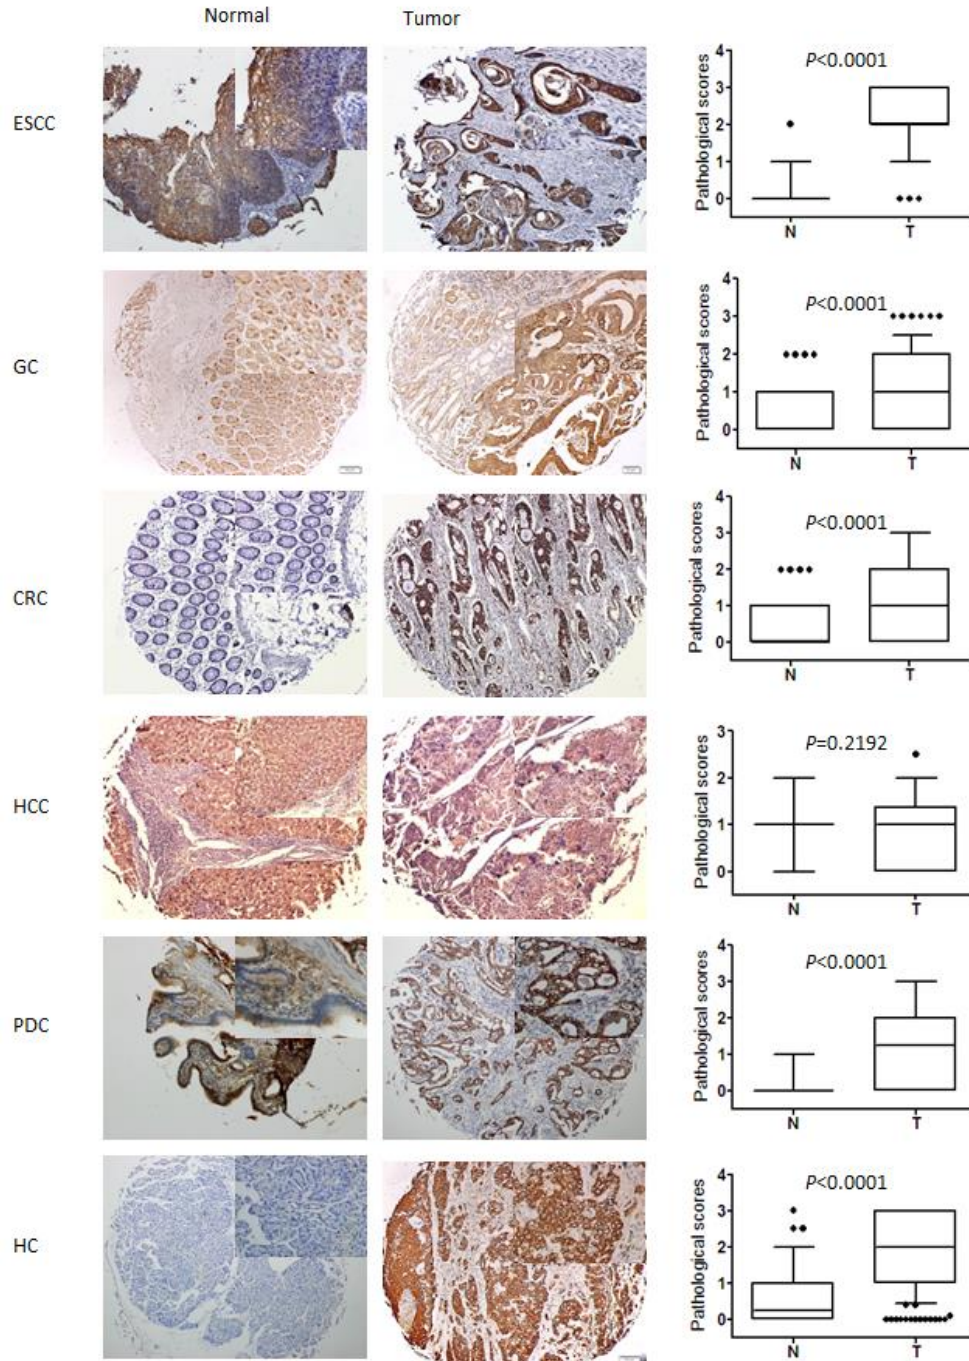

Fig.S1: Expression of PRR11 in the six gastrointestinal tumors and matched non-cancerous tissues. Left, normal tissues; Middle, tumors; Right, Graphical representation of the intensity of PRR11 staining between normal and cancer tissues.

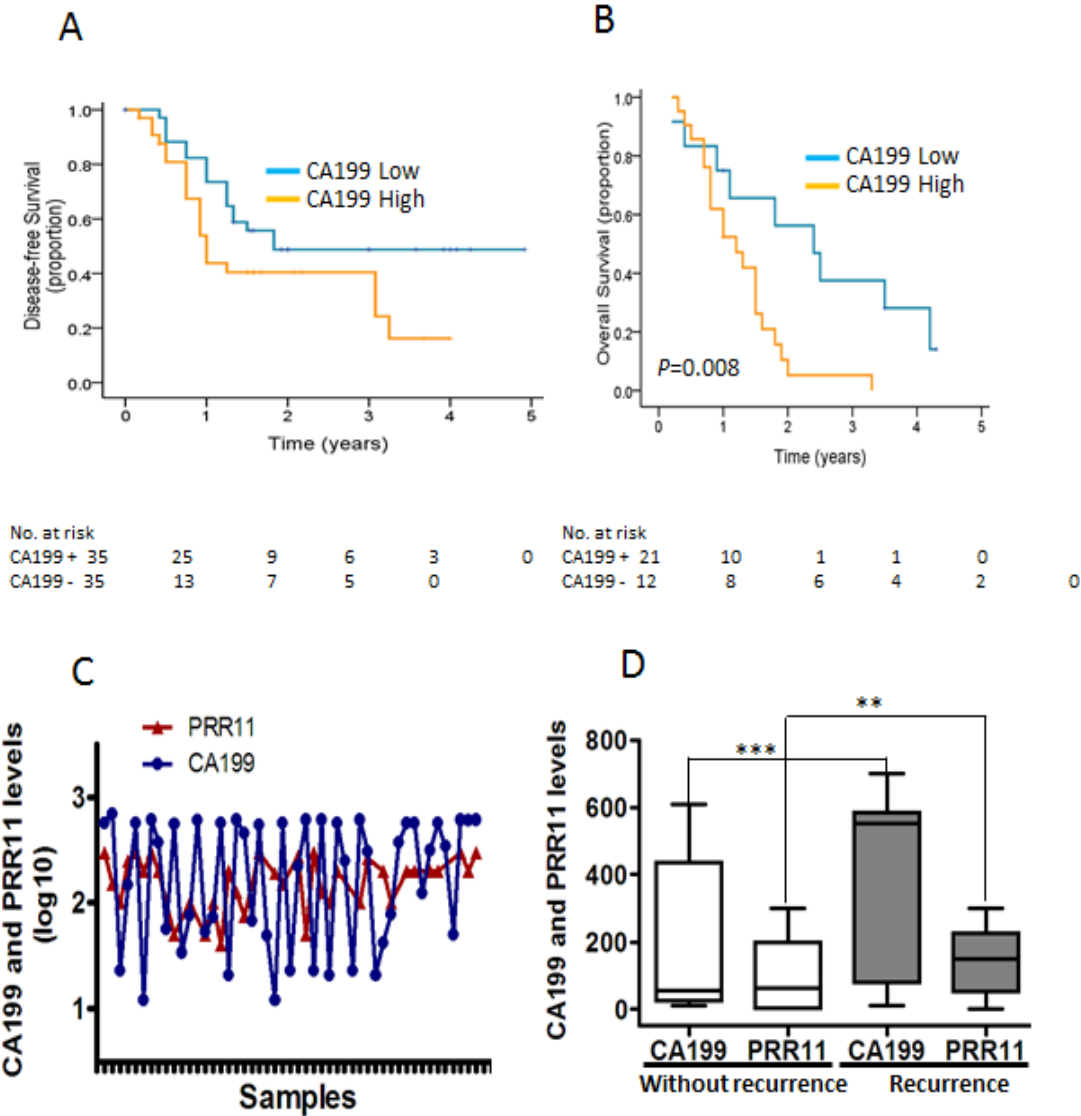

Fig.S2. CA199 levels were associated with disease-free survival (A) and overall survival of patients with hilar cholangiocarcinoma (B). PRR11 levels correlated remarkably with CA199 levels in representative samples (C) and in sub-groups according to recurrence (D). \*\* $P < 0.01$ , \*\*\* $P < 0.001$ .

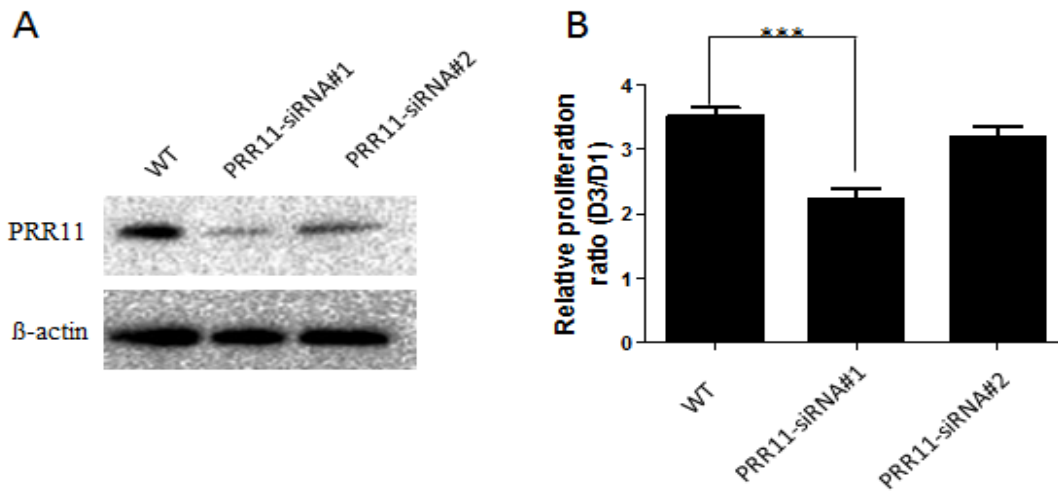

Fig.S3: PRR11-siRNA leads to the inhibition of cell proliferation. Two siRNA (#1 TTC CAG GAG TGA TTA AGA C and #2 AGA CCA TAC TCT ATT TGT C) targeting PRR11 was constructed by Genechem Biotech, Shanghai, China and was transiently transfected into QBC939 cells. Western blot was used to detect the levels of PRR11 protein (A) and MTT assay was used to measure the proliferation ratio between these groups (B).

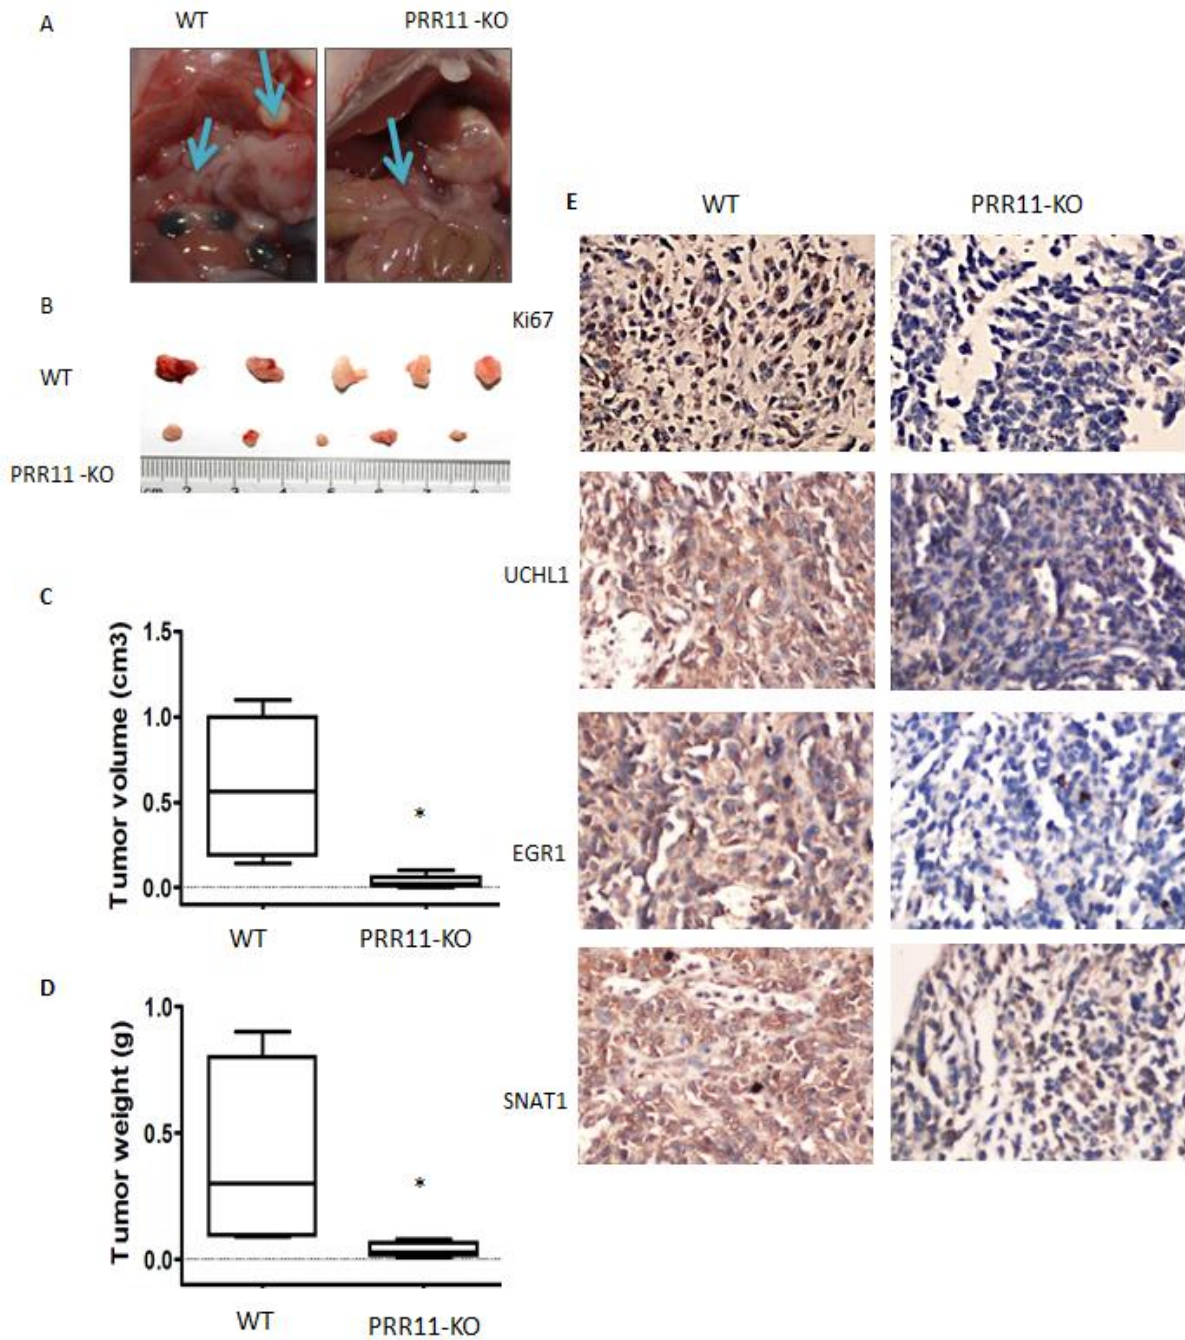

Fig.S4: Representative anatomical pictures (A) and resected tumors (B) of *in situ* tumor transplantation of hilar cholangiocarcinoma cells. The tumor size (D) and tumor weight (E) were evaluated at the end of the experiment. \* $P < 0.01$ , compared with the WT group. E) The expression of SNAT1, UCHL1, and EGR1 proteins was detected in resected tumors from the WT group (left) and the PRR11-KO group (right). IHC $\times 400$ .

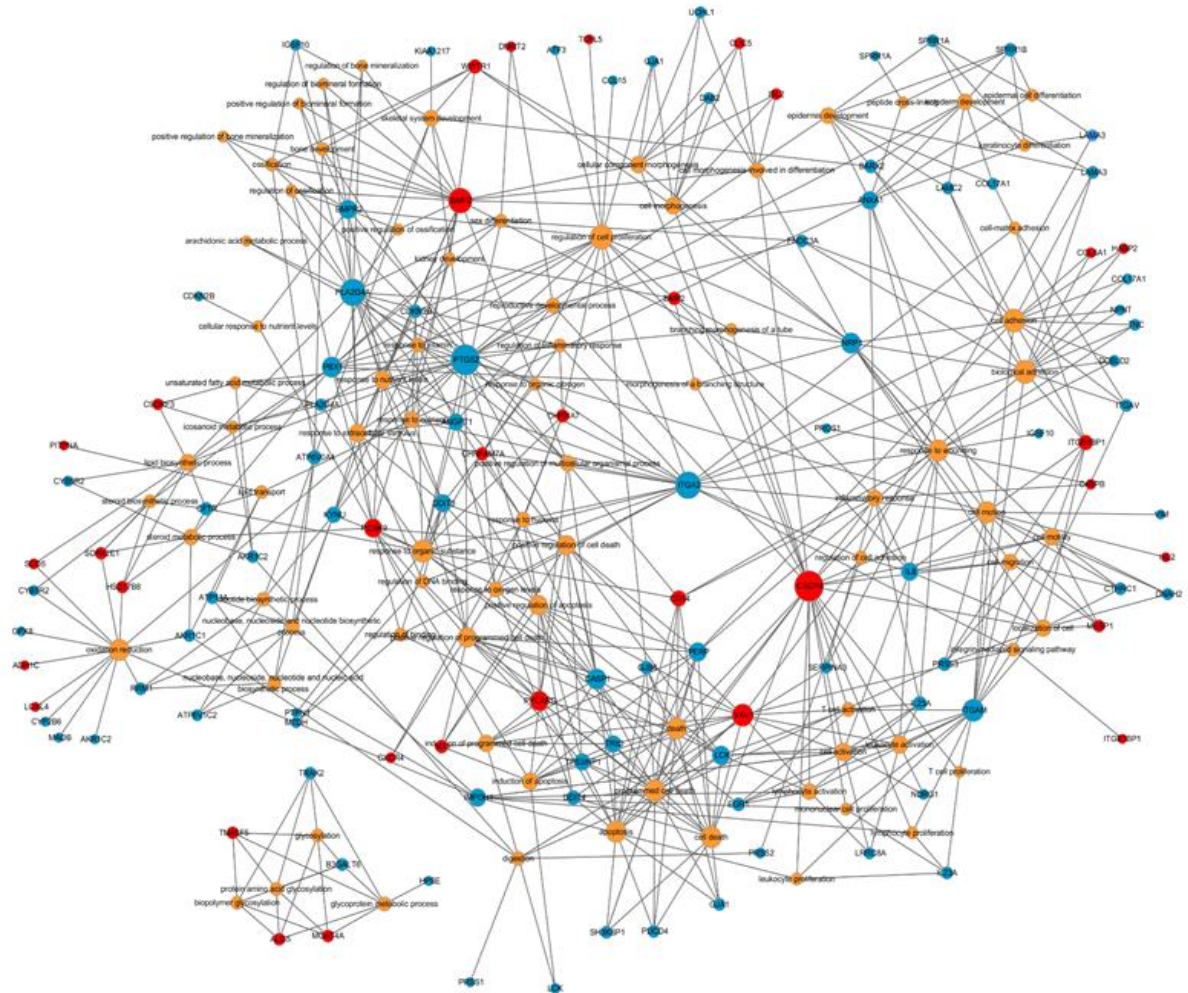

Fig.S5: The correlation between the altered genes and the biological processes analyzed by go-network analysis.

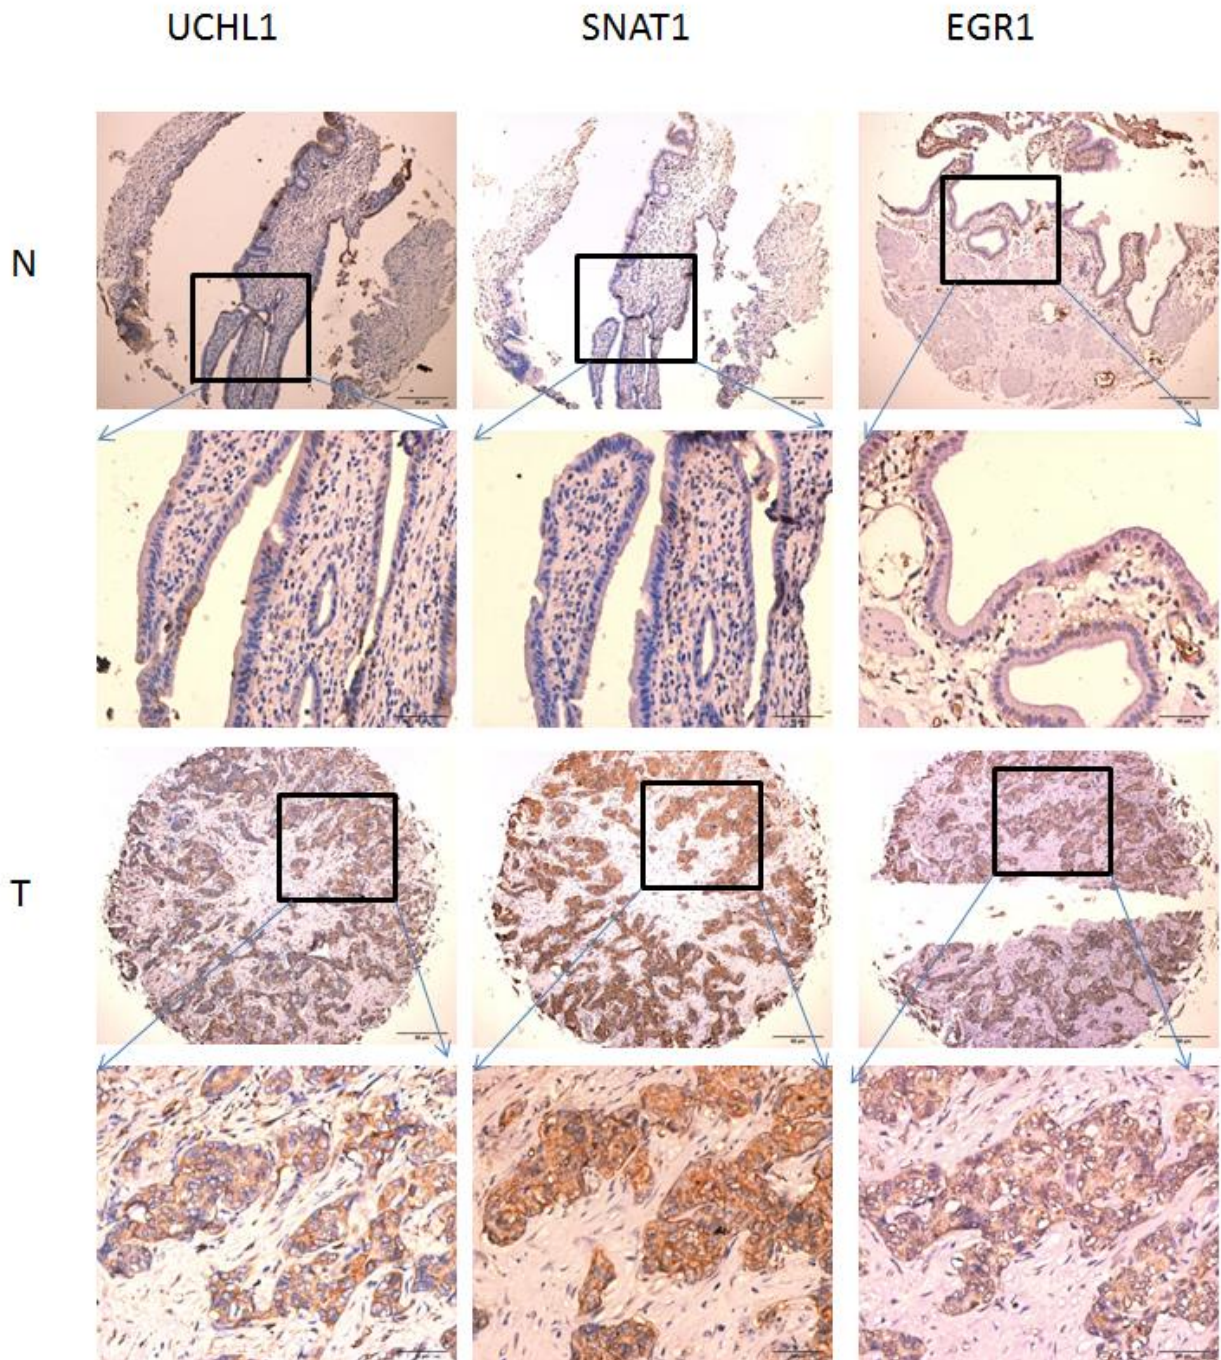

Fig.S6: Analysis of UCHL1, SNAT1, and EGR1 expression in human hilar cholangiocarcinoma. N, normal tissues; T, Tumor samples.

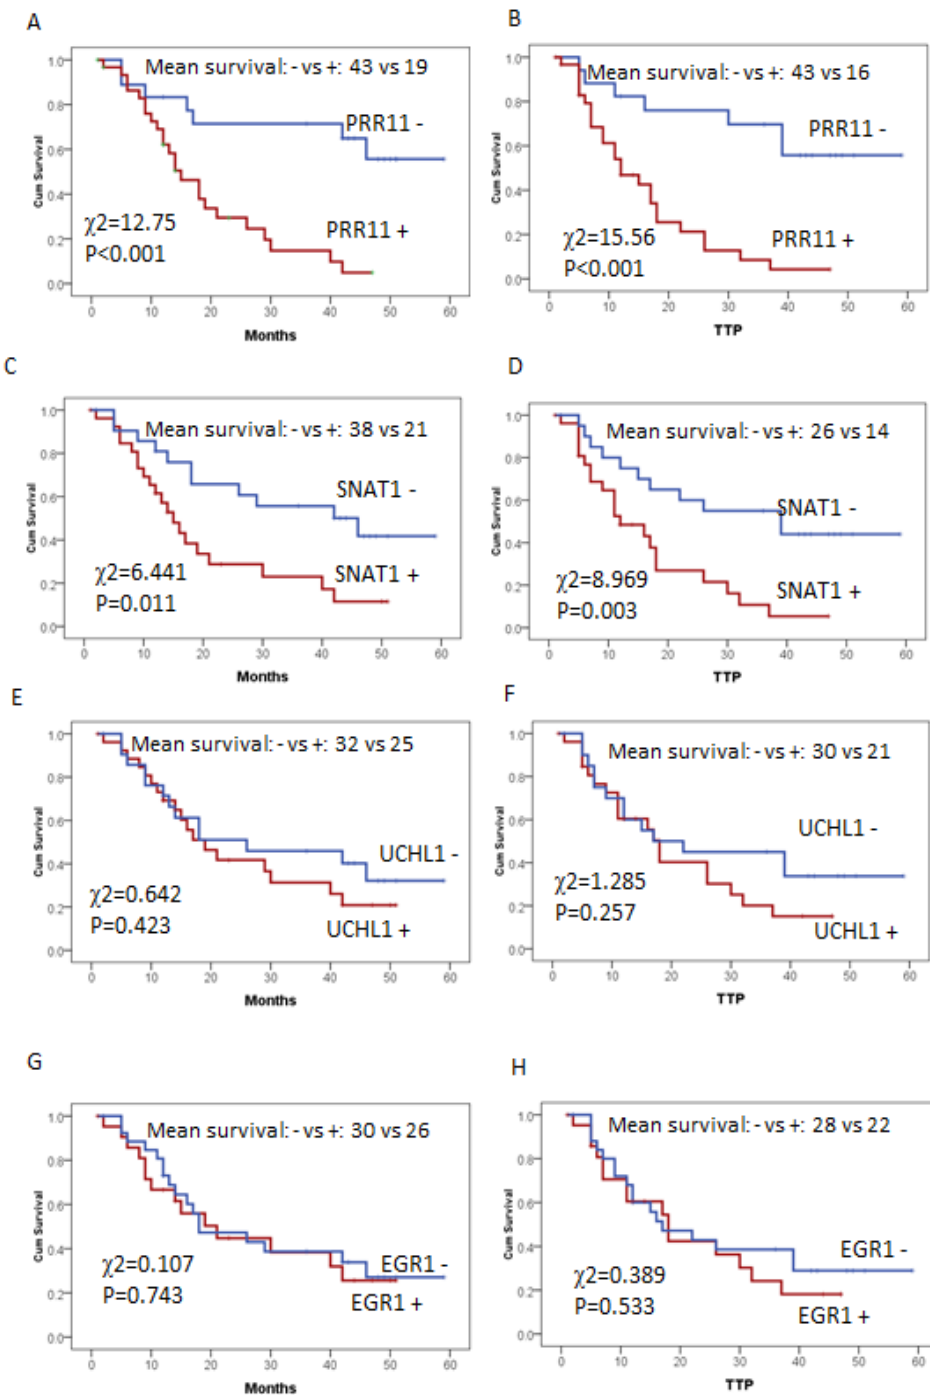

Fig.S7. Survival analysis of the 49 cohort revealed that PRR11 (A, B) and SNAT1 (C, D) is an important predictor for tumor recurrence and prognostic factor for HC patients, while UCHL1 (E, F) and EGR1 (G, H) was not a significant indicator of tumor recurrence and prognosis.

Supplemental Table 1. Correlations between PRR11 expression and CA199 status and levels

| PRR11    | CA199 status |          | r     | P     | CA199 level |      | r     | P     |
|----------|--------------|----------|-------|-------|-------------|------|-------|-------|
|          | Negative     | Positive |       |       | Low         | High |       |       |
| Negative | 10           | 16       | 0.230 | 0.018 | 18          | 8    | 0.259 | 0.008 |
| Positive | 13           | 66       |       |       | 31          | 48   |       |       |

Supplemental Table 2. Univariate and Multivariate Analysis of Variables Associated With OS in Patients Submitted to an R1/2 Resection

| Variable     | No. of Patients | Median Survival (years) |         | P<br>(univariate<br>) | P<br>(multivariate<br>) | Hazard Ratio | 95% CI         |
|--------------|-----------------|-------------------------|---------|-----------------------|-------------------------|--------------|----------------|
|              |                 | Median                  | Range   |                       |                         |              |                |
| PRR11        |                 |                         |         |                       |                         |              |                |
| Negative     | 10              | 1.80                    | 0.4-4.3 | 0.023                 | 0.306                   | 0.546        | 0.172 to 1.736 |
| Positive     | 24              | 1.10                    | 0.2-3.3 |                       |                         |              |                |
| CA199 levels |                 |                         |         |                       |                         |              |                |
| Low          | 12              | 2.40                    | 0.2-4.3 | 0.008                 | 0.115                   | 0.430        | 0.150 to 1.228 |
| High         | 21              | 1.20                    | 0.3-3.3 |                       |                         |              |                |



**Supplemental Table 3.** Association between expression of UCHL1, SNAT1, and EGR1 and clinicopathological parameters of hilar cholangiocarcinoma

| Parameters      | n  | UCHL1<br>positive (%) | <i>P</i> | SNAT1<br>positive (%) | <i>P</i> | EGR1<br>positive (%) | <i>P</i> |
|-----------------|----|-----------------------|----------|-----------------------|----------|----------------------|----------|
| Age             |    |                       |          |                       |          |                      |          |
| ≤55y            | 25 | 15 (60.0)             | 0.482    | 14 (56.0)             | 0.897    | 10 (40.0)            | 0.482    |
| >55y            | 24 | 12 (50.0)             |          | 13 (54.2)             |          | 12 (50.0)            |          |
| Gender          |    |                       |          |                       |          |                      |          |
| Male            | 35 | 18 (51.4)             | 0.414    | 19 (54.3)             | 0.856    | 15 (42.9)            | 0.65     |
| Femal           | 14 | 9 (6.3)               |          | 8 (57.1)              |          | 7 (50.0)             |          |
| Tumor size      |    |                       |          |                       |          |                      |          |
| ≤6cm            | 18 | 9 (50.0)              | 0.584    | 9 (50.0)              | 0.584    | 6 (33.3)             | 0.215    |
| >6cm            | 31 | 18 (58.1)             |          | 18 (58.1)             |          | 16 (51.6)            |          |
| T stage         |    |                       |          |                       |          |                      |          |
| T1/2            | 7  | 2 (28.6)              | 0.127    | 2 (28.6)              | 0.127    | 2 (28.6)             | 0.348    |
| T3/4            | 42 | 25 (59.5)             |          | 25 (59.5)             |          | 20 (47.6)            |          |
| N stage         |    |                       |          |                       |          |                      |          |
| No              | 16 | 6 (37.5)              | 0.078    | 4 (25.0)              | 0.003    | 3 (18.8)             | 0.010    |
| Yes             | 33 | 21 (63.6)             |          | 23 (69.7)             |          | 19 (57.6)            |          |
| Differentiation |    |                       |          |                       |          |                      |          |
| High/moderate   | 37 | 20 (54.1)             | 0.796    | 18 (48.6)             | 0.111    | 15 (40.5)            | 0.282    |
| Poor            | 12 | 7 (58.3)              |          | 9 (75.0)              |          | 7 (58.3)             |          |

**Supplemental Table 4.** Data of PRR11 staining

| Case Num. | PRR11 staining |              |           |
|-----------|----------------|--------------|-----------|
|           | Raw data       | neg. or pos. | intensity |
| 1         | 1              | 1            | 1         |
| 2         | 1.4            | 1            | 1         |
| 3         | 2              | 1            | 2         |
| 4         | 2              | 1            | 1         |
| 5         | 0              | 0            | 0         |
| 6         | 1.5            | 1            | 1         |
| 7         | 2              | 1            | 2         |
| 8         | 2.5            | 1            | 3         |
| 9         | 2.5            | 1            | 3         |
| 10        | 1.6            | 1            | 2         |
| 11        | 2              | 1            | 2         |
| 12        | 1              | 1            | 1         |
| 13        | 2              | 1            | 3         |
| 14        | 3              | 1            | 3         |
| 15        | 1              | 1            | 1         |
| 16        | 1.5            | 1            | 1         |
| 17        | 2              | 1            | 1         |
| 18        | 3              | 1            | 3         |
| 19        | 1.5            | 1            | 1         |
| 20        | 2.5            | 1            | 3         |
| 21        | 1              | 1            | 1         |
| 22        | 1              | 1            | 1         |
| 23        | 3              | 1            | 3         |
| 24        | 2              | 1            | 2         |
| 25        | 0              | 0            | 0         |
| 26        | 2              | 1            | 2         |
| 27        | 1.5            | 1            | 1         |
| 28        | 1              | 1            | 1         |
| 29        | 3              | 1            | 3         |
| 30        | 2              | 1            | 1         |
| 31        | 2.8            | 1            | 3         |
| 32        | 1.5            | 1            | 1         |
| 33        | 0.55           | 0            | 0         |
| 34        | 0              | 0            | 0         |
| 35        | 1              | 1            | 2         |
| 36        | 1              | 1            | 1         |
| 37        | 3              | 1            | 3         |
| 38        | 1              | 1            | 1         |
| 39        | 0.6            | 0            | 0         |
| 40        | 0              | 0            | 0         |
| 41        | 2              | 1            | 2         |
| 42        | 2.5            | 1            | 3         |
| 43        | 0              | 0            | 0         |

|    |     |   |   |
|----|-----|---|---|
| 44 | 3   | 1 | 3 |
| 45 | 3   | 1 | 3 |
| 46 | 2   | 1 | 2 |
| 47 | 3   | 1 | 3 |
| 48 | 3   | 1 | 3 |
| 49 | 3   | 1 | 3 |
| 50 | 2   | 1 | 2 |
| 51 | 1   | 1 | 3 |
| 52 | 1   | 1 | 3 |
| 53 | 0   | 0 | 0 |
| 54 | 1   | 1 | 1 |
| 55 | 1.8 | 1 | 2 |
| 56 | 2   | 1 | 2 |
| 57 | 2   | 1 | 2 |
| 58 | 2.2 | 1 | 2 |
| 59 | 3   | 1 | 3 |
| 60 | 1   | 1 | 1 |
| 61 | 2   | 1 | 2 |
| 62 | 3   | 1 | 3 |
| 63 | 2.8 | 1 | 3 |
| 64 | 2.4 | 1 | 2 |
| 65 | 3   | 1 | 3 |
| 66 | 1   | 1 | 1 |
| 67 | 0   | 0 | 0 |
| 68 | 3   | 1 | 3 |
| 69 | 0   | 0 | 0 |
| 70 | 1   | 1 | 1 |
| 71 | 0   | 0 | 0 |
| 72 | 0   | 0 | 0 |
| 73 | 2.2 | 1 | 2 |
| 74 | 0   | 0 | 0 |
| 75 | 2   | 1 | 2 |
| 76 | 0.5 | 1 | 1 |
| 77 | 1   | 1 | 1 |
| 78 | 0   | 0 | 0 |
| 79 | 1   | 1 | 3 |
| 80 | 0   | 0 | 0 |
| 81 | 0   | 0 | 0 |
| 82 | 2.2 | 1 | 2 |
| 83 | 0   | 0 | 0 |
| 84 | 3   | 1 | 3 |
| 85 | 0   | 0 | 0 |
| 86 | 1   | 1 | 3 |
| 87 | 1   | 1 | 2 |
| 88 | 0   | 0 | 0 |
| 89 | 1   | 1 | 2 |
| 90 | 0   | 0 | 0 |

|     |     |   |   |
|-----|-----|---|---|
| 91  | 0   | 0 | 0 |
| 92  | 0.8 | 1 | 1 |
| 93  | 3   | 1 | 3 |
| 94  | 0   | 0 | 0 |
| 95  | 0.5 | 1 | 1 |
| 96  | 1   | 1 | 1 |
| 97  | 0   | 0 | 0 |
| 98  | 2.3 | 1 | 2 |
| 99  | 1.8 | 1 | 2 |
| 100 | 0   | 0 | 0 |
| 101 | 2   | 1 | 2 |
| 102 | 1   | 1 | 1 |
| 103 | 0   | 0 | 0 |
| 104 | 0   | 0 | 0 |
| 105 | 3   | 1 | 3 |
| 106 | 2.2 | 1 | 2 |
| 107 | 3   | 1 | 3 |

---
